# Supplementary material for: The Frontline Nurse’s Experience of Nursing Outlier Patients
Source: MDPI journal article supplement (doi:10.3390/ijerph17145232), 2020-07-20
Supplement: s1 [file s1]

## Supplementary Material

**Table S1.** COREQ (COnsolidated criteria for REporting Qualitative research) Checklist.

| Topic                                          | Item No. | Guide Questions/Description                                                                                                                              | Reported on Page No. |
|------------------------------------------------|----------|----------------------------------------------------------------------------------------------------------------------------------------------------------|----------------------|
| <b>Domain 1: Research Team and Reflexivity</b> |          |                                                                                                                                                          |                      |
| <i>Personal Characteristics</i>                |          |                                                                                                                                                          |                      |
| Interviewer/facilitator                        | 1        | Which author/s conducted the interview or focus group?                                                                                                   | 4                    |
| Credentials                                    | 2        | What were the researcher's credentials? E.g. PhD, MD                                                                                                     | 4                    |
| Occupation                                     | 3        | What was their occupation at the time of the study?                                                                                                      | 4                    |
| Gender                                         | 4        | Was the researcher male or female?                                                                                                                       | 4                    |
| Experience and training                        | 5        | What experience or training did the researcher have?                                                                                                     | 3                    |
| <i>Relationship with Participants</i>          |          |                                                                                                                                                          |                      |
| Relationship established                       | 6        | Was a relationship established prior to study commencement?                                                                                              | 4                    |
| Participant knowledge of the interviewer       | 7        | What did the participants know about the researcher? e.g. personal goals, reasons for doing the research                                                 | 4                    |
| Interviewer characteristics                    | 8        | What characteristics were reported about the interviewer/facilitator? e.g. Bias, assumptions, reasons and interests in the research topic                | 4                    |
| <b>Domain 2: Study Design</b>                  |          |                                                                                                                                                          |                      |
| <i>Theoretical Framework</i>                   |          |                                                                                                                                                          |                      |
| Methodological orientation and Theory          | 9        | What methodological orientation was stated to underpin the study? e.g. grounded theory, discourse analysis, ethnography, phenomenology, content analysis | 3                    |
| <i>Participant Characteristics</i>             |          |                                                                                                                                                          |                      |
| Sampling                                       | 10       | How were participants selected? e.g. purposive, convenience, consecutive, snowball                                                                       | 4-purposive          |
| Method of approach                             | 11       | How were participants approached? e.g. face-to-face, telephone, mail, email                                                                              | 4                    |
| Sample size                                    | 12       | How many participants were in the study?                                                                                                                 | Table 1              |
| Non-participation                              | 13       | How many people refused to participate or dropped out? Reasons?                                                                                          | N/A                  |
| <i>Setting</i>                                 |          |                                                                                                                                                          |                      |
| Setting of data collection                     | 14       | Where was the data collected? e.g. home, clinic, workplace                                                                                               | 4                    |
| Presence of non-participants                   | 15       | Was anyone else present besides the participants and researchers?                                                                                        | N/A                  |
| Description of sample                          | 16       | What are the important characteristics of the sample? e.g. demographic data, date                                                                        | Table 1              |
| <i>Data Collection</i>                         |          |                                                                                                                                                          |                      |
| Interview guide                                | 17       | Were questions, prompts, guides provided by the authors? Was it pilot tested?                                                                            | 4                    |
| Repeat interviews                              | 18       | Were repeat inter views carried out? If yes, how many?                                                                                                   | N/A                  |
| Audio/visual recording                         | 19       | Did the research use audio or visual recording to collect the data?                                                                                      | 4                    |
| Field notes                                    | 20       | Were field notes made during and/or after the interview or focus group?                                                                                  | 5                    |
| Duration                                       | 21       | What was the duration of the inter views or focus group?                                                                                                 | 4                    |
| Data saturation                                | 22       | Was data saturation discussed?                                                                                                                           | 4                    |
| Transcripts returned                           | 23       | Were transcripts returned to participants for comment and/or correction?                                                                                 | N/A                  |
| <b>Domain 3: analysis and findings</b>         |          |                                                                                                                                                          |                      |
| <i>Data analysis</i>                           |          |                                                                                                                                                          |                      |

|                                |    |                                                                          |               |
|--------------------------------|----|--------------------------------------------------------------------------|---------------|
| Number of data coders          | 24 | How many data coders coded the data?                                     | 5             |
| Description of the coding tree | 25 | Did authors provide a description of the coding tree?                    | 5             |
| Derivation of themes           | 26 | Were themes identified in advance or derived from the data?              | 5             |
| Software                       | 27 | What software, if applicable, was used to manage the data?               | 5             |
| Participant checking           | 28 | Did participants provide feedback on the findings?                       | 4             |
| <i>Reporting</i>               |    |                                                                          |               |
| Quotations presented           | 29 | Were participant quotations presented to illustrate the themes/findings? |               |
|                                |    | Was each quotation identified? e.g. participant number                   |               |
| Data and findings consistent   | 30 | Was there consistency between the data presented and the findings?       | Resultsp.5–15 |
| Clarity of major themes        | 31 | Were major themes clearly presented in the findings?                     |               |
| Clarity of minor themes        | 32 | Is there a description of diverse cases or discussion of minor themes?   |               |

Developed from: Tong A, Sainsbury P, Craig J. Consolidated criteria for reporting qualitative research (COREQ): a 32-item checklist for interviews and focus groups. *International Journal for Quality in Health Care*. 2007. Volume 19, Number 6: pp. 349–357.
